# Supplementary material
Source: PubMed Central journal article supplement (PMC10212531)
Supplement: NIHMS1893325-supplement-Supplemental_Publication_Material.pdf [file NIHMS1893325-supplement-Supplemental_Publication_Material.pdf]

**Supplementary Table 1.** Codes uses to ascertain conditions.

| Coding standard | Stroke                                                                                                                                                                                                                                  |
|-----------------|-----------------------------------------------------------------------------------------------------------------------------------------------------------------------------------------------------------------------------------------|
| ICD-9 CM        | 430, 431, 434.0, 434.1, 434.9, 436.X                                                                                                                                                                                                    |
| ICD-10 CM       | I60, I60.0 , I60.1, I60.2, I60.3, I60.4, I60.5, I60.6, I60.7, I60.8, I60.9, I61, I61.0 , I61.1, I61.2, I61.3, I61.4, I61.5, I61.6, I61.8, I61.9, I63, I63.0 , I63.1, I63.2, I63.3, I63.4, I63.5, I63.6, I63.8, I63.9, I63.X, I64, I64.X |

**Supplementary Table 2.** Genetic instruments for frailty

| <b>SNP</b>  | <b>CHR</b> | <b>BP</b> | <b>Reported trait besides Frailty index</b>                       |
|-------------|------------|-----------|-------------------------------------------------------------------|
| rs12789243  | 1          | 210128698 | -                                                                 |
| rs4952693   | 2          | 43924669  | -                                                                 |
| rs2071207   | 3          | 50122411  | -                                                                 |
| rs583514    | 3          | 173396377 | -                                                                 |
| rs82334     | 4          | 3223644   | -                                                                 |
| rs1363103   | 5          | 104582136 | Subjective well-being,<br>Neuropsychiatric disorders,<br>Insomnia |
| rs9275160   | 6          | 32684843  | complement C4 measurement,<br>prostate carcinoma                  |
| rs2396766   | 7          | 114678016 | -                                                                 |
| rs56299474  | 8          | 22135291  | -                                                                 |
| rs4146140   | 10         | 60125604  | -                                                                 |
| rs10891490  | 11         | 113014805 | -                                                                 |
| rs3959554   | 15         | 41151726  | coronary artery disease, body height                              |
| rs17612102  | 15         | 51971897  | -                                                                 |
| rs8089807   | 18         | 41742675  | -                                                                 |
| rs111432129 | 2          | 207175279 | -                                                                 |
| rs758591652 | 3          | 136419233 | -                                                                 |
| rs796921150 | 8          | 113025459 | -                                                                 |
| rs7219015   | 17         | 2652298   | Brain shape (segment 41),<br>Depression,<br>cortical thickness    |
| rs77338984  | 17         | 30815796  | -                                                                 |
| rs10625032  | 17         | 49395505  | -                                                                 |

**Supplementary Table 3.** Baseline characteristics between participants excluded (without electronic health in *All of us*) and participants included in the analysis.

| <b>Participant Characteristics</b> | <b>Excluded</b> | <b>Included</b> |
|------------------------------------|-----------------|-----------------|
| <b>n</b>                           | 114,266         | 258,688         |
| Age (Mean, SD)                     | 48.7 (17.1)     | 52.0 (16.9)     |
| <b>Sex</b>                         |                 |                 |
| Female                             | 67,766 (59.3%)  | 155,118 (60.0%) |
| Male                               | 42,742 (37.4%)  | 96,248 (37.2%)  |
| Non-binary/Not answered            | 3,731 (3.3%)    | 7,269 (2.8%)    |
| <b>Race/Ethnicity</b>              |                 |                 |
| Asian                              | 5,089 (4.5%)    | 7,067 (2.7%)    |
| Black or African American          | 19,184 (16.8%)  | 52,962 (20.5%)  |
| Hispanic or Latino                 | 18,255 (16.0%)  | 48,538 (18.8%)  |
| Other                              | 8,679 (7.6%)    | 17,295 (6.7%)   |
| White                              | 63,059 (55.2%)  | 132,826 (51.3%) |

**Supplementary Table 4.** Cox proportional hazard regression models for HFERS and stroke risk.

| <b>Variable</b>           | <b>HR (95% CI)</b> |
|---------------------------|--------------------|
| <b>Any Stroke</b>         |                    |
| <b>HFERS</b>              |                    |
| No-frailty                | REFERENCE          |
| Low                       | 6.0 (4.4-8.1)      |
| Intermediate              | 17.2 (12.8-22.9)   |
| High                      | 78.3 (58.8-104.2)  |
| <b>Ischemic Stroke</b>    |                    |
| <b>HFERS</b>              |                    |
| No-frailty                | REFERENCE          |
| Low                       | 6.4 (4.6-8.9)      |
| Intermediate              | 17.9 (13.1-24.6)   |
| High                      | 78.6 (57.8-107.0)  |
| <b>Hemorrhagic Stroke</b> |                    |
| <b>HFERS</b>              |                    |
| No-frailty                | REFERENCE          |
| Low                       | 4.2 (1.8-9.8)      |
| Intermediate              | 14.3 (6.6-30.9)    |
| High                      | 98.2 (51.6-232.43) |

Adjusted by age, sex and race/ethnicity. All p-values were <0.001.

- HFERS = Hospital Frailty Risk Score
- HR = Hazard ratio

**Supplementary Table 5. Stratified analysis.**

| <b>HFRS</b>  | <b>Any Stroke</b>                    |                      |
|--------------|--------------------------------------|----------------------|
|              | <b>Age</b>                           |                      |
|              | <b>Interaction p-value &lt;0.001</b> |                      |
|              | <b>&lt;65</b>                        | <b>&gt;65</b>        |
| No-Frailty   | REFERENCE                            |                      |
| Low          | 4.0<br>(2.8-5.8)                     | 7.3<br>(3.8-14.2)    |
| Intermediate | 10.2<br>(7.35-14.3)                  | 16.4<br>(8.6-30.9)   |
| High         | 40.8<br>(29.2-56.9)                  | 64.4<br>(34.2-121.2) |
|              | <b>Ischemic Stroke</b>               |                      |
|              | <b>Age</b>                           |                      |
|              | <b>Interaction p-value &lt;0.001</b> |                      |
|              | <b>&lt;65</b>                        | <b>&gt;65</b>        |
| No-Frailty   | REFERENCE                            |                      |
| Low          | 3.9<br>(2.7-5.7)                     | 9.7<br>(4.5-21.2)    |
| Intermediate | 9.5<br>(6.7-13.6)                    | 2.0<br>(9.7-44)      |
| High         | 35.1<br>(24.7-49.9)                  | 79.4<br>(37.4-168.5) |
|              | <b>Hemorrhagic Stroke</b>            |                      |
|              | <b>Age</b>                           |                      |
|              | <b>Interaction p-value &lt;0.001</b> |                      |
|              | <b>&lt;65</b>                        | <b>&gt;65</b>        |
| No-Frailty   | REFERENCE                            |                      |
| Low          | 5.4<br>(6.6-51.7)                    | 2.2<br>(0.5-8.6)     |
| Intermediate | 18.5<br>(6.6-51.7)                   | 6.7<br>(2.0-22.4)    |
| High         | 144.2<br>(52.4-396.9)                | 45.3<br>(13.9-146.6) |

**Supplementary Table 6.** Mendelian randomization summary statistics.

| MR Method                   | SNIPS N | OR       | CI                         | p-     |
|-----------------------------|---------|----------|----------------------------|--------|
| <b>Large artery stroke</b>  |         |          |                            |        |
| IVW                         | 16      | 2.67     | (95%CI 1.4-5.0)            | 0.002  |
| WM                          | 16      | 3.15     | (95%CI 1.3-7.1)            | 0.006  |
| MR-Egger                    | 16      | 2.42     | (95%CI 0.02-387.2)         | 0.73   |
| MR-PRESSO                   | 16      | 2.67     | (95%CI 1.7-4.0)            | 0.0003 |
| MR-Egger Intercept          | 16      | 1        | (95%CI 0.9-1.1)            | 0.97   |
| Global Test                 | 16      | -        | -                          | 0.9723 |
| <b>Small vessel stroke</b>  |         |          |                            |        |
| IVW                         | 16      | 1.9      | (95%CI 1.0-3.4)            | 0.03   |
| WM                          | 16      | 1.97     | (95%CI 0.8-4.4)            | 0.09   |
| MR-Egger                    | 16      | 0.37     | (95%CI 0-38.3)             | 0.67   |
| MR-PRESSO                   | 16      | 1.9      | (95%CI 1.1-3.2)            | 0.034  |
| MR-Egger Intercept          | 16      | 1.04     | (95%CI 0.9-1.1)            | 0.49   |
| Global Test                 | 16      | -        | -                          | 0.64   |
| <b>Cardioembolic stroke</b> |         |          |                            |        |
| IVW                         | 16      | 1        | (95%CI 0.5-1.9)            | 0.47   |
| WM                          | 16      | 1.21     | (95%CI 0.7-2.0)            | 0.99   |
| MR-Egger                    | 16      | 0.19     | (95%CI 0-10.8)             | 0.43   |
| MR-PRESSO                   | 16      | 1.21     | (95%CI 0.7-2.0)            | 0.48   |
| MR-Egger Intercept          | 16      | 1.04     | (95%CI 0.9-1.1)            | 0.37   |
| Global Test                 | 16      | -        | -                          | 0.39   |
| <b>Deep ICH</b>             |         |          |                            |        |
| IVW                         | 14      | 9.9      | (95%CI 1.9-51.3)           | 0.006  |
| WM                          | 14      | 8.07     | (95%CI 0.8-78.2)           | 0.07   |
| MR-Egger                    | 14      | 5.06     | (95%CI 0-1310581.5)        | 0.80   |
| MR-PRESSO                   | 14      | 2.19     | (95%CI 0.01-676.5)         | 0.011  |
| MR-Egger Intercept          | 14      | 9.9      | (95%CI 2.1-46)             | 0.91   |
| Global Test                 | 14      | -        | -                          | 0.61   |
| <b>Lobar ICH</b>            |         |          |                            |        |
| IVW                         | 14      | 3.58     | (95%CI 0.5-21.8)           | 0.16   |
| WM                          | 14      | 4.81     | (95%CI 0.4-52.7)           | 0.19   |
| MR-Egger                    | 14      | 84475.01 | (95%CI 0.08-87158162771.7) | 0.13   |
| MR-PRESSO                   | 14      | 3.58     | (95%CI 0.8-15.3)           | 0.10   |
| MR-Egger Intercept          | 14      | 0.81     | (95%CI 0.6-1.0)            | 0.17   |
| Global Test                 | 14      | -        | -                          | 0.82   |
| <b>aSAH</b>                 |         |          |                            |        |
| IVW                         | 14      | 2.27     | (95%CI 1.2-4.1)            | 0.006  |
| WM                          | 14      | 2.31     | (95%CI 1.0-5.1)            | 0.04   |
| MR-Egger                    | 14      | 63.15    | (95%CI 0.6-6217.8)         | 0.10   |
| MR-PRESSO                   | 14      | 2.27     | (95%CI 1.4-3.5)            | 0.003  |
| MR-Egger Intercept          | 14      | 1.07     | (95%CI 0.9-1.1)            | 0.177  |
| Global Test                 | 14      | -        | -                          | 0.87   |

**Supplementary Table 7.** Secondary Mendelian randomization summary statistics.

| <b>MR Method</b>           | <b>SNIPS N</b> | <b>OR</b> | <b>CI</b>        | <b>p-value</b> |
|----------------------------|----------------|-----------|------------------|----------------|
| <b>Any Stroke</b>          |                |           |                  |                |
| IVW                        | 15             | 1.5       | (95%CI 1.1-1.9)  | 0.001          |
| <b>Any Ischemic Stroke</b> |                |           |                  |                |
| IVW                        | 16             | 1.34      | (95%CI 1.04-5.1) | 0.009          |
| <b>All ICH</b>             |                |           |                  |                |
| IVW                        | 14             | 8.29      | (95%CI 1.9-34.6) | 0.003          |

- MR = Mendelian randomization
- SNP = Single-nucleotide polymorphisms
- OR = Odds ratio
- CI = Confident interval
- IVW = Inverse-variance weighted
